1 **Title:** Age and sex-dependent patterns of gut microbial diversity in human adults

2

3 **Authors/Address/Email:**

4

5 Jacobo de la Cuesta-Zuluaga<sup>1</sup>

6 Department of Microbiome Science, Max Planck Institute for Developmental Biology, 72076

7 Tübingen, Germany.

8 Email: [jacobo.delacuesta@tuebingen.mpg.de](mailto:jacobo.delacuesta@tuebingen.mpg.de)

9

10 Scott T. Kelley<sup>1</sup>

11 Department of Biology, San Diego State University, San Diego, California, USA

12 Email: [skelley@sdsu.edu](mailto:skelley@sdsu.edu)

13

14 Yingfeng Chen

15 Department of Biology, San Diego State University, San Diego, California, USA

16 Email: [cyf298@hotmail.com](mailto:cyf298@hotmail.com)

17

18 Juan S. Escobar

19 Vidarium-Nutrition, Health and Wellness Research Center, Grupo Empresarial Nutresa,

20 Medellin, Colombia

21 Email: [jsescobar@serviciosnutresa.com](mailto:jsescobar@serviciosnutresa.com)

22

23 Noel T. Mueller

24 Department of Epidemiology, Johns Hopkins Bloomberg School of Public Health, Baltimore,

25 MD, USA

26 Welch Center for Epidemiology, Prevention and Clinical Research, Johns Hopkins Medical

27 Institutions, Baltimore, MD, USA

28 Email: [noelmueller@jhu.edu](mailto:noelmueller@jhu.edu)

29

30 Ruth E. Ley

31 Department of Microbiome Science, Max Planck Institute for Developmental Biology, 72076

32 Tübingen, Germany.

33 Email: [ruth.ley@tuebingen.mpg.de](mailto:ruth.ley@tuebingen.mpg.de)

34

35 Daniel McDonald

36 Department of Pediatrics, University of California San Diego, La Jolla, California, USA

37 Email: [danielmcdonald@ucsd.edu](mailto:danielmcdonald@ucsd.edu)

38

39 Shi Huang

40 Department of Pediatrics, University of California San Diego, La Jolla, California, USA

41 Email: [shh047@ucsd.edu](mailto:shh047@ucsd.edu)

42

43 Austin D. Swafford

44 Center for Microbiome Innovation, University of California, La Jolla, California, USA

45 Email: [adswafford@ucsd.edu](mailto:adswafford@ucsd.edu)

46

47 Rob Knight

48 Department of Pediatrics, University of California San Diego, La Jolla, California, USA

49 Department of Computer Science, University of California San Diego, La Jolla, California, USA

50 Department of Bioengineering, University of California San Diego, La Jolla, California, USA

51 Center for Microbiome Innovation, University of California, La Jolla, California, USA

52 Email: [robknight@ucsd.edu](mailto:robknight@ucsd.edu)

53

54 Varykina G. Thackray\*

55 Department of Obstetrics, Gynecology and Reproductive Sciences, University of California San

56 Diego, La Jolla, California, USA

57 Email: [vthackray@ucsd.edu](mailto:vthackray@ucsd.edu)

58

59 <sup>1</sup>Contributed equally to this work

60 \*Corresponding Author

61

62 Keywords: Diversity, Sex, Age, Microbiome; 16S rRNA amplicon

63

64

65 **Abstract**

66

67 Gut microbial diversity changes throughout the human lifespan and is known to be affected by  
68 host sex. We investigated the association of age, sex and gut bacterial alpha diversity in three  
69 large cohorts of adults from four geographical regions: US and UK cohorts in the American Gut  
70 Project, and two independent cohorts of Colombians and Chinese. In three of the four cohorts,  
71 we observed a strong positive association between age and alpha diversity in young adults that  
72 plateaued after age 40. We also found pronounced sex-dependent differences in younger but  
73 not middle-aged adults, and women had higher alpha diversity than men. In contrast, no  
74 association of alpha diversity with age or sex was observed in the Chinese cohort. These  
75 associations were maintained after adjusting for cardiometabolic parameters in the Colombian  
76 cohort and antibiotic usage in the AGP cohort, suggesting that these factors do not affect the  
77 association of alpha diversity with age and sex. We also used a machine learning approach to  
78 predict individual age based on the gut microbiome. Consistent with our alpha diversity-based  
79 findings, women had significantly higher predicted age than men in the US and UK cohort, with  
80 a reduced difference above age 40. This was not observed in the Colombian cohort and only in  
81 the group of middle-age adults in the Chinese cohort. Together, our results provide new insights  
82 into the influence of age and sex on biodiversity of the human gut microbiota during adulthood  
83 while highlighting similarities and differences across diverse cohorts.

84

85 **Importance**

86

87 Bacteria in the human gut play important roles in health and disease, and higher gut biodiversity  
88 has been linked to better health. Since gut bacteria may be pivotal in the development of  
89 microbial therapies, understanding the factors that shape gut biodiversity is of utmost interest.  
90 We performed large-scale analyses of the relationship of age and sex to gut bacterial diversity  
91 in adult cohorts from four geographic regions: US, UK, Colombia and China. In the US, UK and  
92 Colombia cohorts, bacterial biodiversity correlated positively with age in young adults, but  
93 plateaued around age 40 with no positive correlation in middle-aged adults. Young, but not  
94 middle-aged, adult women had higher gut bacterial diversity than men, a pattern confirmed via  
95 deep machine-learning. Interestingly, in the Chinese cohort, minimal associations were  
96 observed between gut biodiversity and age or sex. Our results highlight patterns of adult gut  
97 biodiversity and provide a framework for future research.

98

99

## 100 **Introduction**

101 The human gut microbiota is a highly diverse ecosystem that is extremely variable amongst  
102 individuals (Lloyd-Price et al., 2017). This microbial community has been shown to play a key  
103 role in human health and disease (Gilbert et al., 2016). Since the gut microbiota may be pivotal  
104 to the development of microbial therapies, understanding factors that shape overall gut  
105 microbiota biodiversity over the different human life stages is of utmost interest.

106 There is increasing evidence suggesting that the host genes, gene expression patterns,  
107 environmental exposures, including medication and diet, and lifestyle factors play an important  
108 role in delimiting the boundaries of microbial diversity in the gut (Foster et al., 2017; McDonald  
109 et al., 2018). While a detailed longitudinal study of the interplay of each of these factors would  
110 be scientifically, logistically, and financially challenging, the chronological age of the host may  
111 be conceived as a proxy variable that represents the accumulation of these effects for a given  
112 individual. Several studies have reported a positive correlation between age and gut microbiota  
113 alpha diversity from birth to adulthood (Hopkins et al., 2002; Koenig et al., 2011; Mariat et al.,  
114 2009; Yatsunenکو et al., 2012). Likewise, it has been shown that alpha diversity is maintained in  
115 old age until comorbidities contribute to its decline (Maffei et al., 2017). Another intriguing host-  
116 associated pattern identified in humans and rodents is the link between the gut microbiota and  
117 sex. Recent studies reported that women have higher microbial diversity than men and that sex  
118 influences the composition of the microbial community after puberty (Falony et al., 2016; Kozik  
119 et al., 2017; Markle et al., 2013; Sinha et al., 2018; Yatsunenکو et al., 2012). These differences  
120 may contribute to the sexual dimorphism of autoimmune (Gomez et al., 2012; Markle et al.,  
121 2013; Yurkovetskiy et al., 2013) and neuro-immune diseases (Wallis et al., 2017, 2016).  
122 Therefore, it is key to consider the impact of inherent age and sex differences in different human  
123 populations to adequately discriminate changes and variations in the microbiome of individuals.

124 To better understand how age and sex of the host relate to the diversity of the gut  
125 microbiota during adulthood, we explored the association of these factors using data from  
126 individuals in three cross-sectional studies from four geographical origins including the citizen-  
127 science American Gut Project (AGP) comprised of individuals from the United States (US) and  
128 the United Kingdom (UK) (McDonald et al., 2018), a cohort of individuals from China (He et al.,  
129 2018) and a relatively smaller study with individuals from Colombia (de la Cuesta-Zuluaga et al.,  
130 2018).

## 131 **Materials and Methods**

### 132 *Cohort description*

133  
134  
135 Fecal samples were obtained from individuals in three independent cohorts from four  
136 geographical locations: i) The AGP dataset is composed of two cohorts with individuals from the  
137 UK (539 women and 397 men), and the US (1361 women and 1227 men) (Table 1); healthy  
138 participants self-reported age between 20 and 69, a body mass index (BMI) between 18.5 and  
139 30 kg/m<sup>2</sup>, and no history of inflammatory bowel disease, diabetes, or antibiotic use in the past  
140 year. ii) A cohort of Chinese individuals (2772 women and 2191 men) aged 20 to 69, with BMI  
141 ranging from 18.5 to 30 kg/m<sup>2</sup> and no antibiotic consumption reported one month prior to fecal  
142 sample collection; pregnant women, and hospitalized, disabled or critically-ill individuals were  
143

144 not included in the study. iii) A cohort of community-dwelling Colombians (226 women and 211  
145 men), 20 to 62 years of age, enrolled in similar proportions according to: BMI, city of residence,  
146 and age range (20-40 and 41-62 years); underweight participants, pregnant women, individuals  
147 who had consumed antibiotics or antiparasitics in the three months prior to enrollment, and  
148 individuals diagnosed with neurodegenerative diseases, current or recent cancer (<1 year), and  
149 gastrointestinal diseases were excluded. Details on the data acquisition, quality assessment  
150 and processing of fecal samples from these three cohorts were previously described (de la  
151 Cuesta-Zuluaga et al., 2018; He et al., 2018; McDonald et al., 2018).

152

### 153 *16S rRNA gene sequence processing*

154

155 Amplicon sequences of all three cohorts were uniformly processed following the same  
156 procedures previously described (McDonald et al., 2018). Briefly, the V4 hypervariable region of  
157 the 16S rRNA gene was sequenced with the Illumina MiSeq platform. Raw sequences were  
158 clustered into sequence variants (SV) with deblur denoising (Amir et al., 2017) using QIIME 2  
159 (Bolyen et al., 2018). Sequence counts were rarefied to 1250 reads per sample across all  
160 samples to mitigate uneven sequencing depth. Note, however, that sample collecting and DNA  
161 extraction methods differed between studies.

162

### 163 *Statistical analyses*

164

165 SV richness and Shannon index were calculated using QIIME 2 and statistical analyses were  
166 performed using R v.3.4.3. The association of age and alpha diversity was measured with and  
167 without separate age groups by fitting linear models with linear splines with a knot at age 45  
168 (lspline v.1.0 package of R) or simple linear models, respectively. We assessed the goodness of  
169 fit of these models by means of the Akaike's information criterion (AIC). Next, scatter plots of  
170 each alpha diversity metric according to age were constructed and then separate LOESS  
171 curves for women and men were fitted using the ggplot2 v.3.0 package of R. Given the  
172 nonlinear association observed between alpha diversity and age, we subdivided the datasets  
173 into two separate age groups: 20 to 45 years (young adult) and 46 to 69 years (middle-aged  
174 adult), which were then used to fit linear models to test associations of age (as a continuous  
175 variable) and alpha diversity measures, stratified by sex.

176

177 Additionally, to account for possible confounder effects of antibiotic usage or  
178 cardiometabolic health of the subjects, we replicated the above analyses as follows. For the  
179 former, we replicated the analyses using a separate group of individuals of the AGP cohort from  
180 the US who had consumed antibiotics during the 6 months prior to their enrollment (283 women  
181 and 174 men). For the latter, we replicated the analyses adjusting the linear models for  
182 cardiometabolic risk in the Colombian cohort using a risk measure, which we termed  
183 cardiometabolic risk scale (Guzman-Castaneda et al., 2018). This was calculated using the sum  
184 of the z-scores of log-transformed waist circumference, triglycerides, insulin, diastolic blood  
185 pressure and high-sensitivity C reactive protein; positive values of the score are associated with  
186 increased cardiometabolic health risk.

186

187 Random Forest (RF) regression was used to regress relative abundances of SVs in the  
188 gut microbiota of healthy women and men adults against their chronological age in each

188 dataset, using the R package randomForest and the following parameters: ntree = 18,000 and  
189 mtry =  $p/3$ , where  $p$  is the number of input features (SVs). The microbiota age model was first  
190 trained on the training dataset of female adults and was then applied to test the set of male  
191 adults, and vice versa. A smoothing spline function was fit between microbiota age and  
192 chronological age of the hosts for calculation of “relative microbiota age” of adults in the test  
193 sets to which the sparse model was applied. For a particular sample, the relative microbiota age  
194 was calculated as the difference between the “microbiota age of a focal adult” and the  
195 “microbiota age of interpolated spline fit of healthy women/men adults at the same chronological  
196 age”. We further employed Wilcoxon rank-sum test to compare the relative microbiota age  
197 between female and male groups in each of datasets using the R function Wilcox.test. To  
198 establish the sex difference in microbiota age, we subdivided the datasets into the above-  
199 defined age groups, and repeated the analyzes as described above in all age segments.

200 The code and data required to reproduce the statistical analyses is available at  
201 [https://github.com/jacodela/microbio\\_aDiv](https://github.com/jacodela/microbio_aDiv).

202

## 203 Results

204

205 Basic characteristics of individuals from the four cohorts are summarized in Table 1,  
206 stratified by sex and age group. To assess changes in alpha diversity with age during  
207 adulthood, we first performed linear regression with linear splines, establishing a knot at 45  
208 years of age, and simple linear regressions in each cohort independently. We then evaluated  
209 the goodness of fit of each model using AIC, which indicated that changes in alpha diversity are  
210 better explained by distinguishing between young adults (20-45 years) and middle-aged adults  
211 (46-69 years). In the US, UK and Colombian cohorts, we observed a positive but non-linear  
212 association between alpha diversity measures and age, in both women and men. LOESS  
213 curves fit independently by sex showed an inflection point after age 40 in each of these cohorts  
214 (Fig. 1A-C). In contrast, we did not observe such a pattern in the Chinese cohort, in which alpha  
215 diversity displayed a slight decrease with age (Fig. 1D).

216 We then fit linear regression models to examine associations of microbial diversity, age  
217 and sex in the different age groups of each cohort independently. In both the US and UK  
218 cohorts, we observed a positive relationship between microbial richness and age for both sexes  
219 in young adults (US:  $p < 0.001$ ; UK:  $p < 0.001$ ), but not in middle-aged adults (US:  $p = 0.404$ ;  
220 UK:  $p = 0.111$ ) (Fig. 1A-B). In addition, after adjusting for age we observed significant or  
221 borderline significant differences in overall SV richness between sexes in young adults (US:

222  $\Delta_{\text{men} - \text{women}} = -3.3.$ ,  $p\text{-value} = 0.066$ ; UK:  $\Delta_{\text{men} - \text{women}} = -9.84$ ,  $p\text{-value} = 0.003$ ) but not middle-aged

223 adults (US:  $\Delta_{\text{men} - \text{women}} = -1.3$ ,  $p\text{-value} = 0.48$ ; UK:  $\Delta_{\text{men} - \text{women}} = -3.7$ ,  $p\text{-value} = 0.24$ ). Similar

224 results were observed when we assessed taxa evenness using the Shannon index (Fig. S1).

225 Finally, we observed a significant interaction between age and sex with the Shannon index, but  
226 not SV richness, in young (Shannon US:  $p = 0.02$ ; Shannon UK:  $p = 0.03$ ; SV richness US:  $p =$   
227  $0.15$  ; SV richness UK:  $p = 0.09$ ) but not middle-aged adults ( $p > 0.2$  all comparisons).

228 To establish whether these trends were present in other populations, we then examined  
229 the association of alpha diversity with age and sex in the different age groups of cohorts from  
230 Colombia and China. Similar to the US and UK cohorts from the AGP, we identified a positive



231 relationship between richness and age in the Colombian cohort in young adults of both sexes  
232 (p-value = 0.002) but not in middle-aged adults (p-value = 0.722) (Fig. 1C). Likewise, there was  
233 a significant difference in overall SV richness between the sexes in young adults ( $\Delta_{\text{men} - \text{women}} = -$   
234 10.0; p-value = 0.006) but not in middle-aged adults ( $\Delta_{\text{men} - \text{women}} = -7.3$ ; p-value = 0.15).  
235 Potentially due to a smaller sample size, we did not find a significant interaction between age  
236 and sex on microbial diversity in the Colombian cohort for young (p = 0.91) or middle-aged  
237 adults (p = 0.81). In contrast to the US, UK and Colombian cohorts, we did not observe a  
238 relationship between biodiversity and age in young adults from the Chinese cohort (Fig. 1D).  
239 Men in the Chinese cohort tended to have lower SV richness compared to women as young  
240 adults, yet the difference was not significant (young adults:  $\Delta_{\text{men} - \text{women}} = -4.46$ , p-value = 0.051;  
241 middle-aged adults:  $\Delta_{\text{men} - \text{women}} = -4.08$ , p-value = 0.63).

242 Given that gut microbial diversity may be affected by factors such as antibiotic use or the  
243 cardiometabolic health of the host, we replicated the above analyses in cohorts in which we  
244 observed the patterns making use of publicly available metadata. To test whether the  
245 consumption of antibiotics affected the observed pattern, we performed the above analyses on  
246 a set of 457 individuals (283 women and 174 men) from the US cohort of the AGP that reported  
247 having consumed antibiotics in the 6 months prior to enrollment. As expected, we observed  
248 lower SV richness in these individuals compared to those that did not consume antibiotics.  
249 Additionally, our results indicated that the usage of antibiotics did not degrade the association of  
250 alpha diversity with age or sex in the AGP cohort (Fig. 2). Likewise, we replicated the analyses  
251 in the Colombian cohort after introducing a composite measure of the cardiometabolic health of  
252 the subjects as a covariate to the linear models; after we adjusted analyses for cardiometabolic  
253 health score, the observed patterns were similar (Fig. 3).

254 To examine whether similar age and sex-associated patterns in the gut microbiota would  
255 be observed applying an orthogonal method, we utilized a supervised machine learning  
256 approach using the composition of the gut microbiota of the subjects of the different populations.  
257 We subdivided each cohort by sex, determined the SVs shared by both groups, and used their  
258 relative abundances and the chronological age at time of sample collection of the host to fit a  
259 random forest (RF) regression model. Two models were built for women and men groups aged  
260 from 20-69 years; each trained using one sex and tested on the other. For each subject, we  
261 calculated the relative microbiota age as the difference between its microbiota age and the  
262 microbiota age of interpolated spline fit of an individual of the opposite sex at the same  
263 chronological age. Overall, our results indicate that the regressions can explain only 7-10 % of  
264 the variance in chronological age (from 20-69 years) of unrelated healthy adults from the US  
265 cohort.

266 We used 1494 shared SVs between women and men to build the RF model of the US  
267 cohort (Fig. 4A). We found that men exhibited lower relative microbiota age than women  
268 (p=6.237e-14, Wilcoxon rank-sum test; Fig. 4B, upper panels), suggesting sex may affect the  
269 adult gut microbial aging process. To validate this finding, we also trained a RF model in the  
270 men group and then applied to women (Fig. 4A, lower panels); we found women had higher  
271 microbiota age (p=2.467e-12, Wilcoxon rank-sum test. Fig. 4B, lower panels). To establish  
272 whether these trends were present in different age groups, we then examined the sex-

273 dependent association of microbiota age in young and middle-aged separately. In the young  
274 group, we selected the 1311 shared SVs between both sexes to build the RF model for women  
275 and then applied it to predict the microbiota age of men. Compared to men, we found young  
276 women exhibited slightly higher relative microbiota age ( $p=0.0003225$ . Fig. 4C, D, upper  
277 panels). Similar results were observed when we assessed microbiota age in the middle-aged  
278 group, in which we used the 1601 shared SVs sexes to build the RF model as above. Microbiota  
279 age was higher in women compared to men ( $p=3.895e-15$ . Fig. 4C, D, upper panels).  
280 Furthermore, such sex difference in microbiota age were not affected when we applied men's  
281 model to women data (Fig 4C, D, lower panels). Overall, our results indicate that the  
282 regressions can explain only 4.8-5.0 % of the variance in chronological age of unrelated healthy  
283 adults in the sex-stratified groups from the US cohort.

284 Likewise, in the UK cohort, we found higher microbiota age of women than that of men  
285 (from women to men:  $p= 0.001401$ ; from men to women:  $p= 1.093e-05$ , Wilcoxon rank-sum test;  
286 Fig. 4E, F) using 1613 SVs in either women or men's microbiota for building and applying RF  
287 models. In addition, we observed significant or borderline significant differences in relative  
288 microbiota age between sexes in young (from women to men:  $p= 0.1387$ ; from men to women:  
289  $p= 0.01376$ . Fig. 4G, H) and middle-aged (from women to men:  $p= 0.0001719$ ; from men to  
290 women:  $p= 0.05378$ . Fig. 4G, H).

291 In the Colombian cohort we used 1074 SVs shared between sexes to build the RF  
292 model; similar yet non-significant trends were observed between microbiota age and sex in the  
293 non-stratified analyses (from women to men:  $p= 0.1103$ ; from men to women:  $p= 0.9997$ ,  
294 Wilcoxon rank-sum test; Fig. 4I, J), and in the young (from women to men:  $p= 0.1546$ ; from men  
295 to women:  $p= 0.2519$ . Fig. 4K, L), and middle-aged groups (from women to men:  $p= 0.1435$ ;  
296 from men to women:  $p= 0.8326$ . Fig. 4K, L). This is likely due to the smaller sample size of this  
297 cohort. We used 1279 SVs shared between sexes to build the RF models in the Chinese cohort,  
298 the association between microbiota age and sex in was not consistent when we cross-tested  
299 models (from women to men:  $p= 0.4248$ ; from men to women:  $p= 2.422e-06$ . Fig. 4M, N). We  
300 did not observe significant associations in the young group (from women to men:  $p= 0.1249$ ;  
301 from men to women:  $p= 0.01444$ . Fig. 4O, P), whereas in the middle-aged we observed sex-  
302 dependent difference of microbiota age and such differences are consistent in the cross-  
303 application of the models (from women to men:  $p= 0.03222$ ; from men to women:  $p= 7.612e-12$ .  
304 Fig. 4O, P).

## 305 306 **Discussion**

307  
308 In this study, we analyzed the association of gut microbial alpha diversity with age and sex in  
309 three large cross-sectional cohorts encompassing four distinct human populations with a focus  
310 on gut bacteria of healthy adults. Our analyses indicate that age is positively associated with gut  
311 bacterial diversity in men and women, with greater diversity in women than men. Notably, this  
312 association occurs in young, but not middle-aged, adults. Consistent with these findings,  
313 predicted microbiota age varied based on sex with stronger effects seen in young adults. It is  
314 worth underscoring that while we did not observe these patterns in all studied cohorts, it was  
315 widespread, robust to technical differences, and the alpha diversity observations were not  
316 affected by the cardiometabolic health of the host nor disrupted by antibiotic consumption.



317 These findings provide new insights into the development of the human gut microbiome during  
318 the course of life with regards to both age and sex, and emphasize the importance of including  
319 these factors as covariates in analyses of the human gut microbiota.

320 While the most dramatic change in gut microbiota diversity occurs in early childhood  
321 (Koenig et al., 2011; Yatsunenکو et al., 2012), its increase in adulthood has also been reported  
322 (Odamaki et al., 2016). In the cohorts in which the pattern was present, we observed an  
323 increase in alpha diversity measures in young adults; however, this trend halted around age 40  
324 (Figs 1, S1). This agrees with a previous report, in which no significant differences in alpha  
325 diversity were found between middle-aged and elderly subjects (Biagi et al., 2010). Interestingly,  
326 the relationship between age and diversity was also linked with sex. Multiple studies have  
327 reported differences in the diversity and composition of the gut microbiota between female and  
328 male mice, which appear to be associated with a sex bias in the incidence of specific diseases,  
329 such as type 1 diabetes (Markle et al., 2013; Yurkovetskiy et al., 2013), rheumatoid arthritis  
330 (Gomez et al., 2012), and anxiety (Bridgewater et al., 2017); sex-by-diet interactions have also  
331 been reported (Org et al., 2016). While differences in alpha diversity between males and  
332 females were reported in humans and mice, we showed that the association between sex and  
333 alpha diversity was stronger in young adults compared to middle-aged adults. In agreement with  
334 our results, no differences in alpha diversity were observed between women and men in a  
335 recent study in which the mean age of participants was 60 years (Haro et al., 2016).

336 One of the most intriguing findings was the difference in gut microbiota richness between  
337 the sexes in young adults. This sex-dependent discrepancy suggests that women may enter  
338 adulthood with a more diverse gut microbiota, which plateaus to the same levels in both sexes  
339 by approximately age 40. The establishment of different microbial communities in males and  
340 females may be mediated by sex hormones: female mice show a significant increase in alpha  
341 diversity during puberty (Kelley et al., 2016), and differences in the composition of the  
342 microbiota increase with age, but are eliminated by male castration (Yurkovetskiy et al., 2013).  
343 While little is known about the maturation of the human gut microbiota during puberty, we  
344 speculate that the differential hormonal milieu between women and men, and the earlier timing  
345 of puberty in women, may result in a more rapid diversification of the gut microbiota in women  
346 and that men only achieve the same level of diversification by middle age. Since our findings  
347 are based on cross-sectional data and cannot provide causal inference to test this hypothesis,  
348 future longitudinal studies that take into account factors such as steroid hormonal levels, age  
349 during different stages of puberty, contraceptive consumption, and pregnancy are needed to  
350 comprehend long-term trajectories of human gut microbial diversity.

351 While 3 of the 4 cohorts had an association between age, sex and microbial alpha  
352 diversity, the Chinese cohort did not (Figs 1, S1), indicating that these associations are a  
353 widespread but not universal feature of the human gut microbiota. The overall alpha diversity of  
354 this cohort, as measure by SV and the Shannon index, was lower than the other three cohorts in  
355 terms of SV. We also note that the exclusion criteria of this population was not the same as the  
356 other studies, with only a one-month antibiotic exclusion (versus 1 year) and no stated exclusion  
357 of participants with diabetes or inflammatory bowel disease (He et al. 2018).

358 The striking similarity among the US, UK and Colombian cohorts with regards to age and  
359 sex-dependent effects on microbial biodiversity arose despite different geographical origins,  
360 sample sizes and collection protocols of the studies. Moreover, we also found no apparent

361 effect of antibiotic use (US or UK; Fig. 2) or cardiometabolic health (Colombia; Fig. 3) on the  
362 observed pattern in these cohorts, suggesting that the influence of age and sex on the  
363 microbiota may be similar in other ethnic and cultural groups, beyond the influence of  
364 cardiometabolic disease and antibiotics consumption. Nevertheless, similar large-scale  
365 population studies should be performed or reanalysed to determine the extent to which our  
366 results are generalizable to other populations, particularly in light of the Chinese cohort. Indeed,  
367 the contrast between the UK, US and Colombia cohorts compared to the Chinese cohort  
368 highlights the power of using large datasets and comparative analyses across cohorts to  
369 uncover subtle patterns and reveal novel insights not discernible in smaller studies. This is of  
370 critical importance given the plausibility of population-specific disease signatures of the  
371 microbiome (He et al., 2018).

372

### 373 **Acknowledgements**

374

375 Data acquisition of the Colombian cohort was funded by Grupo Empresarial Nutresa, Dinámica  
376 IPS and EPS SURA. NTM was supported by the National Heart, Lung, and Blood Institute of the  
377 National Institutes of Health under Award Number K01HL141589, and by grants from the Mid-  
378 Atlantic Nutrition Obesity Research Center (P30DK072488) and the Foundation for Gender  
379 Specific Medicine. VGT was supported by the National Institute of Child Health and Human  
380 Development through a cooperative agreement as part of the National Centers for Translational  
381 Research in Reproduction and Infertility (P50 HD012303). STK and VGT received support from  
382 the Max Planck Institute for Developmental Biology in Tübingen. This work is supported by IBM  
383 Research AI through the AI Horizons Network and the UC San Diego Center for Microbiome  
384 Innovation. The content is solely the responsibility of the authors and does not necessarily  
385 represent the official views of the National Institutes of Health. Some authors of this work  
386 collaborate through the Microbiome & Health Network.

387

### 388 **Competing interests**

389

390 While engaged in the research project, JSE was employed by a food company. JdIC-Z, STK,  
391 YC, NTM, REL, SH, ADS, RK, DM and VGT had no competing interests. The funders of this  
392 work had no role in the study design, the collection, analysis or interpretation of the data, the  
393 writing of the report or the decision to submit the paper for publication.

394

### 395 **References**

- 396 Amir, A., McDonald, D., Navas-Molina, J.A., Kopylova, E., Morton, J.T., Zech Xu, Z., Kightley,  
397 E.P., Thompson, L.R., Hyde, E.R., Gonzalez, A., Knight, R., 2017. Deblur Rapidly Resolves  
398 Single-Nucleotide Community Sequence Patterns. *mSystems* 2.  
399 Biagi, E., Nylund, L., Candela, M., Ostan, R., Bucci, L., Pini, E., Nikkila, J., Monti, D., Satokari,  
400 R., Franceschi, C., Brigidi, P., De Vos, W., 2010. Through ageing, and beyond: gut  
401 microbiota and inflammatory status in seniors and centenarians. *PLoS One* 5, e10667.  
402 Bolyen, E., Rideout, J.R., Dillon, M.R., Bokulich, N.A., Abnet, C., Al-Ghalith, G.A., Alexander,  
403 H., Alm, E.J., Arumugam, M., Asnicar, F., Bai, Y., Bisanz, J.E., Bittinger, K., Brejnrod, A.,  
404 Brislawn, C.J., Titus Brown, C., Callahan, B.J., Caraballo-Rodríguez, A.M., Chase, J.,  
405 Cope, E., Da Silva, R., Dorrestein, P.C., Douglas, G.M., Durall, D.M., Duvall, C.,

- 406 Edwardson, C.F., Ernst, M., Estaki, M., Fouquier, J., Gauglitz, J.M., Gibson, D.L.,  
407 Gonzalez, A., Gorlick, K., Guo, J., Hillmann, B., Holmes, S., Holste, H., Huttenhower, C.,  
408 Huttley, G., Janssen, S., Jarmusch, A.K., Jiang, L., Kaehler, B., Kang, K.B., Keefe, C.R.,  
409 Keim, P., Kelley, S.T., Knights, D., Koester, I., Kosciulek, T., Kreps, J., Langille, M.G.I.,  
410 Lee, J., Ley, R., Liu, Y.-X., Lofffield, E., Lozupone, C., Maher, M., Marotz, C., Martin, B.,  
411 McDonald, D., McIver, L.J., Melnik, A.V., Metcalf, J.L., Morgan, S.C., Morton, J., Naimey,  
412 A.T., Navas-Molina, J.A., Nothias, L.F., Orchanian, S.B., Pearson, T., Peoples, S.L.,  
413 Petras, D., Preuss, M.L., Pruesse, E., Rasmussen, L.B., Rivers, A., Michael S Robeson,  
414 I.I., Rosenthal, P., Segata, N., Shaffer, M., Shiffer, A., Sinha, R., Song, S.J., Spear, J.R.,  
415 Swafford, A.D., Thompson, L.R., Torres, P.J., Trinh, P., Tripathi, A., Turnbaugh, P.J., Ul-  
416 Hasan, S., van der Hoof, J.J.J., Vargas, F., Vázquez-Baeza, Y., Vogtmann, E., von Hippel,  
417 M., Walters, W., Wan, Y., Wang, M., Warren, J., Weber, K.C., Williamson, C.H.D., Willis,  
418 A.D., Xu, Z.Z., Zaneveld, J.R., Zhang, Y., Knight, R., Gregory Caporaso, J., 2018. QIIME 2:  
419 Reproducible, interactive, scalable, and extensible microbiome data science ( No.  
420 e27295v1). PeerJ Preprints.
- 421 Bridgewater, L.C., Zhang, C., Wu, Y., Hu, W., Zhang, Q., Wang, J., Li, S., Zhao, L., 2017.  
422 Gender-based differences in host behavior and gut microbiota composition in response to  
423 high fat diet and stress in a mouse model. *Sci. Rep.* 7, 10776.
- 424 de la Cuesta-Zuluaga, J., Corrales-Agudelo, V., Velásquez-Mejía, E.P., Carmona, J.A., Abad,  
425 J.M., Escobar, J.S., 2018. Gut microbiota is associated with obesity and cardiometabolic  
426 disease in a population in the midst of Westernization. *Sci. Rep.* 8, 11356.
- 427 Falony, G., Joossens, M., Vieira-Silva, S., Wang, J., Darzi, Y., Faust, K., Kurilshikov, A.,  
428 Bonder, M.J., Valles-Colomer, M., Vandeputte, D., Tito, R.Y., Chaffron, S., Rymenans, L.,  
429 Verspecht, C., De Sutter, L., Lima-Mendez, G., Dhoe, K., Jonckheere, K., Homola, D.,  
430 Garcia, R., Tigchelaar, E.F., Eeckhaut, L., Fu, J., Henckaerts, L., Zernakova, A.,  
431 Wijmenga, C., Raes, J., 2016. Population-level analysis of gut microbiome variation.  
432 *Science* 352, 560–564.
- 433 Foster, K.R., Schluter, J., Coyte, K.Z., Rakoff-Nahoum, S., 2017. The evolution of the host  
434 microbiome as an ecosystem on a leash. *Nature* 548, 43–51.
- 435 Gilbert, J.A., Quinn, R.A., Debelius, J., Xu, Z.Z., Morton, J., Garg, N., Jansson, J.K., Dorrestein,  
436 P.C., Knight, R., 2016. Microbiome-wide association studies link dynamic microbial  
437 consortia to disease. *Nature* 535, 94–103.
- 438 Gomez, A., Luckey, D., Yeoman, C.J., Marietta, E.V., Berg Miller, M.E., Murray, J.A., White,  
439 B.A., Taneja, V., 2012. Loss of sex and age driven differences in the gut microbiome  
440 characterize arthritis-susceptible 0401 mice but not arthritis-resistant 0402 mice. *PLoS One*  
441 7, e36095.
- 442 Guzman-Castaneda, S.J., Ortega-Vega, E.L., de la Cuesta-Zuluaga, J., Velasquez-Mejia, E.P.,  
443 Rojas, W., Bedoya, G., Escobar, J.S., 2018. Gut microbiota composition explains more  
444 variance in the host cardiometabolic risk than genetic ancestry. *bioRxiv*.
- 445 Haro, C., Rangel-Zúñiga, O.A., Alcalá-Díaz, J.F., Gómez-Delgado, F., Pérez-Martínez, P.,  
446 Delgado-Lista, J., Quintana-Navarro, G.M., Landa, B.B., Navas-Cortés, J.A., Tena-  
447 Sempere, M., Clemente, J.C., López-Miranda, J., Pérez-Jiménez, F., Camargo, A., 2016.  
448 Intestinal Microbiota Is Influenced by Gender and Body Mass Index. *PLoS One* 11,  
449 e0154090.
- 450 He, Y., Wu, W., Zheng, H.-M., Li, P., McDonald, D., Sheng, H.-F., Chen, M.-X., Chen, Z.-H., Ji,  
451 G.-Y., Zheng, Z.-D.-X., Mujagond, P., Chen, X.-J., Rong, Z.-H., Chen, P., Lyu, L.-Y., Wang,  
452 X., Wu, C.-B., Yu, N., Xu, Y.-J., Yin, J., Raes, J., Knight, R., Ma, W.-J., Zhou, H.-W., 2018.  
453 Regional variation limits applications of healthy gut microbiome reference ranges and  
454 disease models. *Nat. Med.*
- 455 Hopkins, M.J., Sharp, R., Macfarlane, G.T., 2002. Variation in human intestinal microbiota with  
456 age. *Dig. Liver Dis.* 34 Suppl 2, S12–8.

- 457 Kelley, S.T., Skarra, D.V., Rivera, A.J., Thackray, V.G., 2016. The Gut Microbiome Is Altered in  
458 a Letrozole-Induced Mouse Model of Polycystic Ovary Syndrome. *PLoS One* 11,  
459 e0146509.
- 460 Koenig, J.E., Spor, A., Scalfone, N., Fricker, A.D., Stombaugh, J., Knight, R., Angenent, L.T.,  
461 Ley, R.E., 2011. Succession of microbial consortia in the developing infant gut microbiome.  
462 *Proc. Natl. Acad. Sci. U. S. A.* 108 Suppl 1, 4578–4585.
- 463 Kozik, A.J., Nakatsu, C.H., Chun, H., Jones-Hall, Y.L., 2017. Age, sex, and TNF associated  
464 differences in the gut microbiota of mice and their impact on acute TNBS colitis. *Exp. Mol.*  
465 *Pathol.* 103, 311–319.
- 466 Lloyd-Price, J., Mahurkar, A., Rahnavard, G., Crabtree, J., Orvis, J., Hall, A.B., Brady, A.,  
467 Creasy, H.H., McCracken, C., Giglio, M.G., McDonald, D., Franzosa, E.A., Knight, R.,  
468 White, O., Huttenhower, C., 2017. Strains, functions and dynamics in the expanded Human  
469 Microbiome Project. *Nature* 550, 61–66.
- 470 Maffei, V.J., Kim, S., Blanchard, E., 4th, Luo, M., Jazwinski, S.M., Taylor, C.M., Welsh, D.A.,  
471 2017. Biological Aging and the Human Gut Microbiota. *J. Gerontol. A Biol. Sci. Med. Sci.*  
472 72, 1474–1482.
- 473 Mariat, D., Firmesse, O., Levenez, F., Guimarães, V., Sokol, H., Doré, J., Corthier, G., Furet, J.-  
474 P., 2009. The Firmicutes/Bacteroidetes ratio of the human microbiota changes with age.  
475 *BMC Microbiol.* 9, 123.
- 476 Markle, J.G.M., Frank, D.N., Mortin-Toth, S., Robertson, C.E., Feazel, L.M., Rolle-Kampczyk,  
477 U., von Bergen, M., McCoy, K.D., Macpherson, A.J., Danska, J.S., 2013. Sex differences in  
478 the gut microbiome drive hormone-dependent regulation of autoimmunity. *Science* 339,  
479 1084–1088.
- 480 McDonald, D., Hyde, E., Debelius, J.W., Morton, J.T., Gonzalez, A., Ackermann, G., Aksenov,  
481 A.A., Behsaz, B., Brennan, C., Chen, Y., DeRight Goldasich, L., Dorrestein, P.C., Dunn,  
482 R.R., Fahimipour, A.K., Gaffney, J., Gilbert, J.A., Gogul, G., Green, J.L., Hugenholtz, P.,  
483 Humphrey, G., Huttenhower, C., Jackson, M.A., Janssen, S., Jeste, D.V., Jiang, L., Kelley,  
484 S.T., Knights, D., Kosciulek, T., Ladau, J., Leach, J., Marotz, C., Meleshko, D., Melnik,  
485 A.V., Metcalf, J.L., Mohimani, H., Montassier, E., Navas-Molina, J., Nguyen, T.T., Peddada,  
486 S., Pevzner, P., Pollard, K.S., Rahnavard, G., Robbins-Pianka, A., Sangwan, N.,  
487 Shorenstein, J., Smarr, L., Song, S.J., Spector, T., Swafford, A.D., Thackray, V.G.,  
488 Thompson, L.R., Tripathi, A., Vázquez-Baeza, Y., Vrbancac, A., Wischmeyer, P., Wolfe, E.,  
489 Zhu, Q., American Gut Consortium, Knight, R., 2018. American Gut: an Open Platform for  
490 Citizen Science Microbiome Research. *mSystems* 3.
- 491 Odamaki, T., Kato, K., Sugahara, H., Hashikura, N., Takahashi, S., Xiao, J.-Z., Abe, F., Osawa,  
492 R., 2016. Age-related changes in gut microbiota composition from newborn to centenarian:  
493 a cross-sectional study. *BMC Microbiol.* 16, 90.
- 494 Org, E., Mehrabian, M., Parks, B.W., Shipkova, P., Liu, X., Drake, T.A., Lusi, A.J., 2016. Sex  
495 differences and hormonal effects on gut microbiota composition in mice. *Gut Microbes* 7,  
496 313–322.
- 497 Sinha, T., Vich Vila, A., Garmeaeva, S., Jankipersadsing, S.A., Imhann, F., Collij, V., Bonder,  
498 M.J., Jiang, X., Gurry, T., Alm, E.J., D'Amato, M., Weersma, R.K., Scherjon, S., Wijmenga,  
499 C., Fu, J., Kurilshikov, A., Zhernakova, A., 2018. Analysis of 1135 gut metagenomes  
500 identifies sex-specific resistome profiles. *Gut Microbes* 1–9.
- 501 Wallis, A., Butt, H., Ball, M., Lewis, D.P., Bruck, D., 2016. Support for the Microgenderome:  
502 Associations in a Human Clinical Population. *Sci. Rep.* 6, 19171.
- 503 Wallis, A., Butt, H., Ball, M., Lewis, D.P., Bruck, D., 2017. Support for the microgenderome  
504 invites enquiry into sex differences. *Gut Microbes* 8, 46–52.
- 505 Yatsunenkov, T., Rey, F.E., Manary, M.J., Trehan, I., Dominguez-Bello, M.G., Contreras, M.,  
506 Magris, M., Hidalgo, G., Baldassano, R.N., Anokhin, A.P., Heath, A.C., Warner, B., Reeder,  
507 J., Kuczynski, J., Caporaso, J.G., Lozupone, C.A., Lauber, C., Clemente, J.C., Knights, D.,

508 Knight, R., Gordon, J.I., 2012. Human gut microbiome viewed across age and geography.  
509 Nature 486, 222–227.  
510 Yurkovetskiy, L., Burrows, M., Khan, A.A., Graham, L., Volchkov, P., Becker, L., Antonopoulos,  
511 D., Umesaki, Y., Chervonsky, A.V., 2013. Gender bias in autoimmunity is influenced by  
512 microbiota. Immunity 39, 400–412.

513

514  
515  
516  
517  
518  
519

**Table 1.** General characteristics of the participants of the included cohorts. Values given as mean (SD)

|          | Age group     | Young (20 - 45)   |                   | Middle Age (46 - 69) <sup>1</sup> |                   |
|----------|---------------|-------------------|-------------------|-----------------------------------|-------------------|
|          | Sex           | Female            | Male              | Female                            | Male              |
| AGP - US | N             | 627               | 644               | 734                               | 583               |
|          | Age           | 34.6 (6.79)       | 33.76 (6.61)      | 56.13 (6.37)                      | 57.13 (6.41)      |
|          | SV richness   | 113.81<br>(33.04) | 109.95<br>(31.51) | 120.40<br>(34.63)                 | 119.0<br>(33.07)  |
|          | Shannon Index | 4.87 (0.83)       | 4.83 (0.80)       | 4.98 (0.89)                       | 5.01 (0.78)       |
| AGP - UK | N             | 195               | 173               | 344                               | 224               |
|          | Age           | 35.9 (6.02)       | 36.4 (6.32)       | 56.45 (6.68)                      | 57.75 (6.85)      |
|          | SV richness   | 132.0<br>(31.69)  | 122.60<br>(32.38) | 142.30<br>(36.27)                 | 139.10<br>(36.23) |
|          | Shannon Index | 5.27 (0.69)       | 5.05 (0.92)       | 5.36 (0.83)                       | 5.29 (0.80)       |
| China    | N             | 946               | 670               | 1826                              | 1521              |
|          | Age           | 35.16 (6.73)      | 34.88 (7.07)      | 56.6 (6.59)                       | 57.36 (6.75)      |
|          | SV richness   | 101.8<br>(27.90)  | 99.66<br>(26.48)  | 99.41<br>(28.67)                  | 101.4<br>(28.50)  |
|          | Shannon Index | 4.47 (0.85)       | 4.40 (0.84)       | 4.36 (0.93)                       | 4.35 (0.95)       |
| Colombia | N             | 143               | 133               | 83                                | 78                |
|          | Age           | 33.83 (7.21)      | 34.21 (6.98)      | 52.48 (4.14)                      | 52.90 (4.42)      |
|          | SV richness   | 120.41<br>(30.21) | 110.71<br>(31.06) | 123.33<br>(32.75)                 | 116.13<br>(33.95) |



|  |                            |              |             |              |             |
|--|----------------------------|--------------|-------------|--------------|-------------|
|  | Shannon index              | 4.60 (1.05)  | 4.48 (1.12) | 4.73 (0.99)  | 4.45 (1.13) |
|  | Cardiometabolic risk scale | -1.14 (3.07) | 0.64 (3.67) | -0.36 (3.06) | 1.39 (2.71) |

520 <sup>1</sup> Age of Colombian individuals ranged from 20 to 62 years

521

522

523

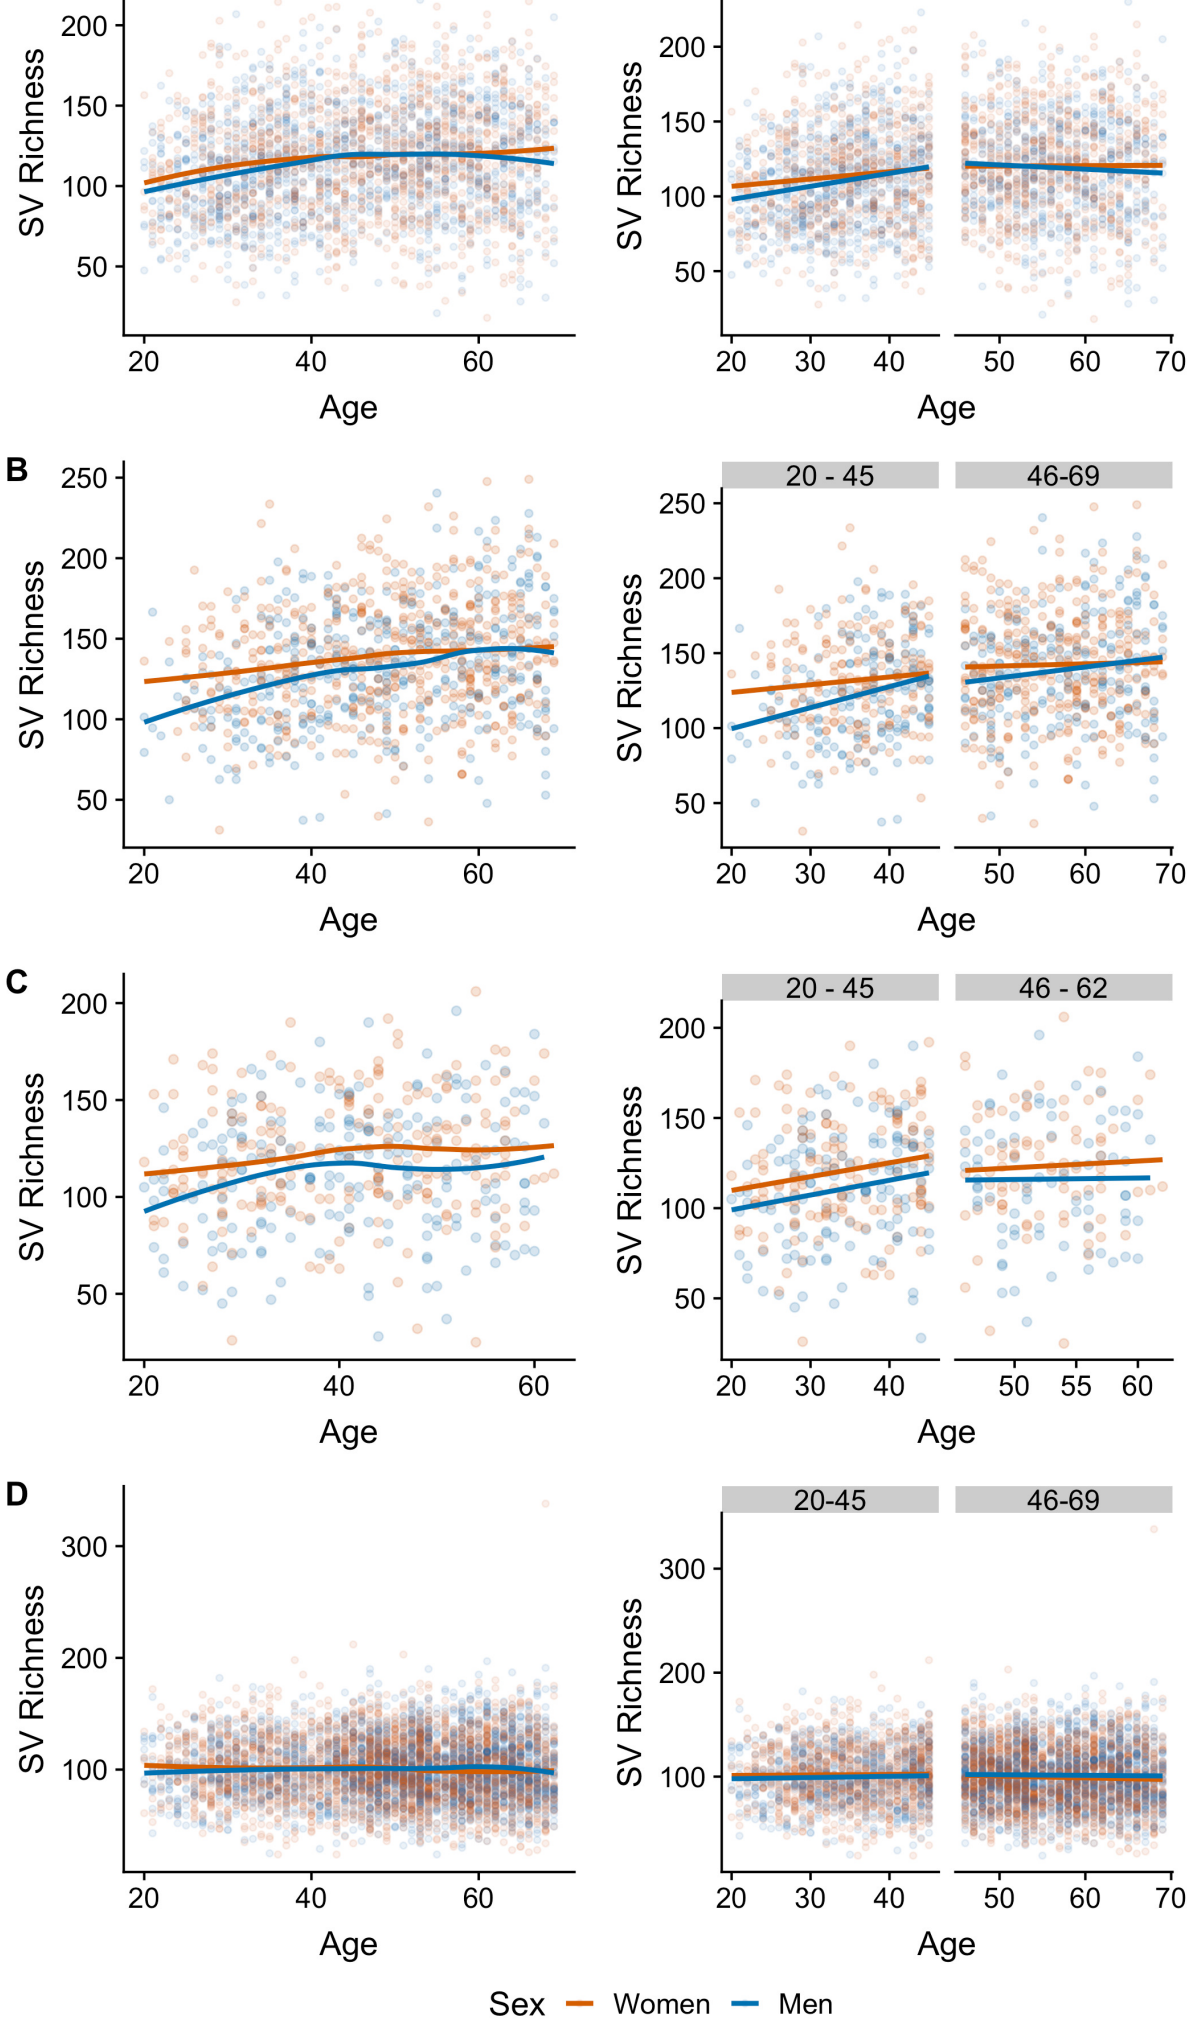

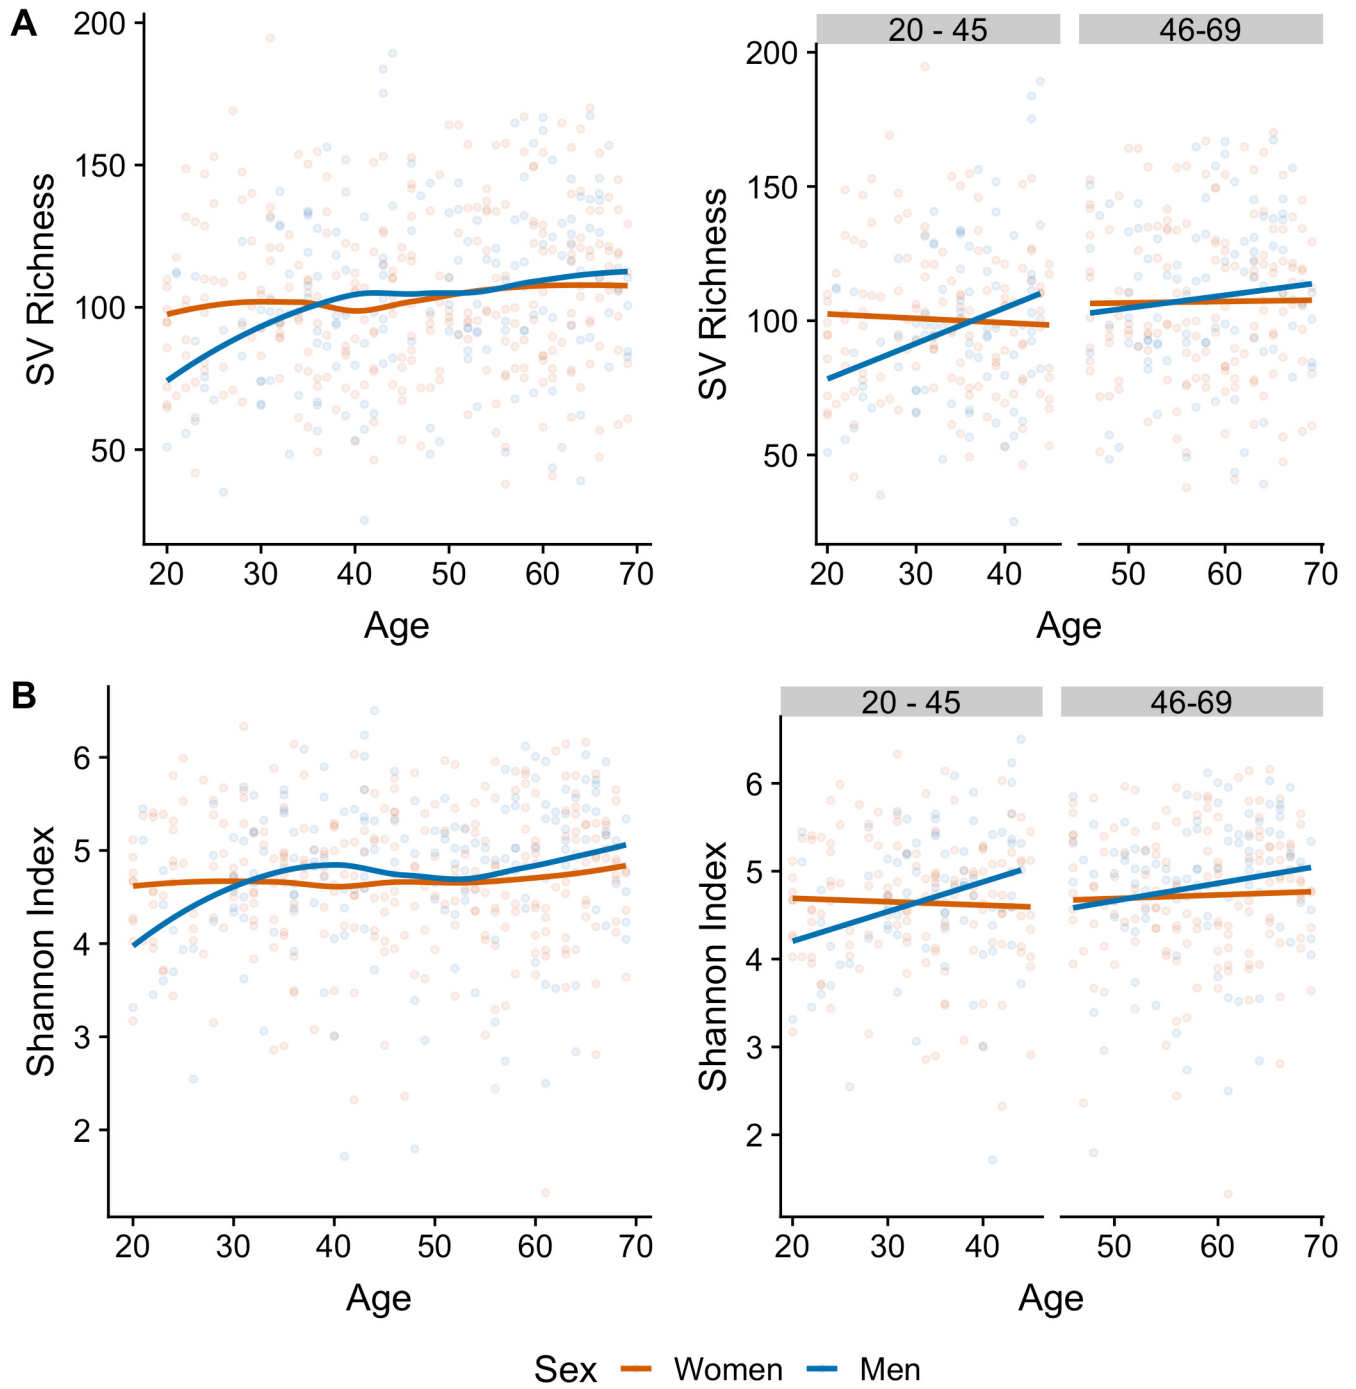

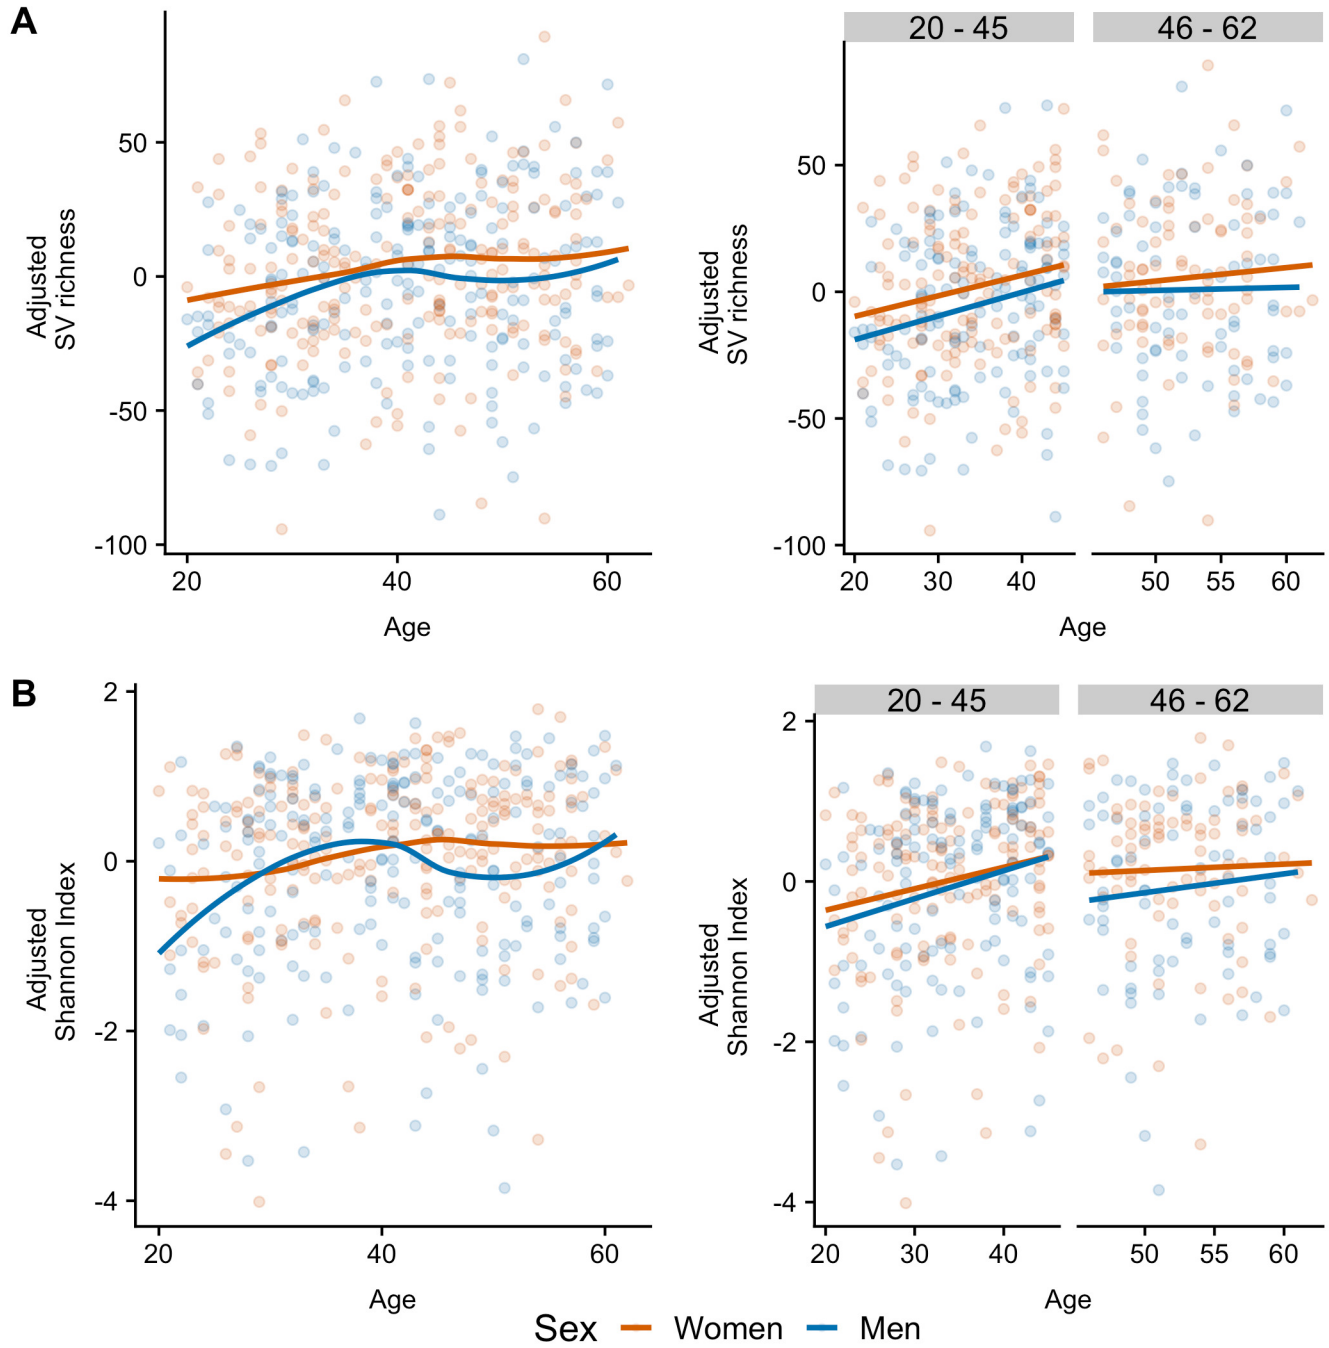



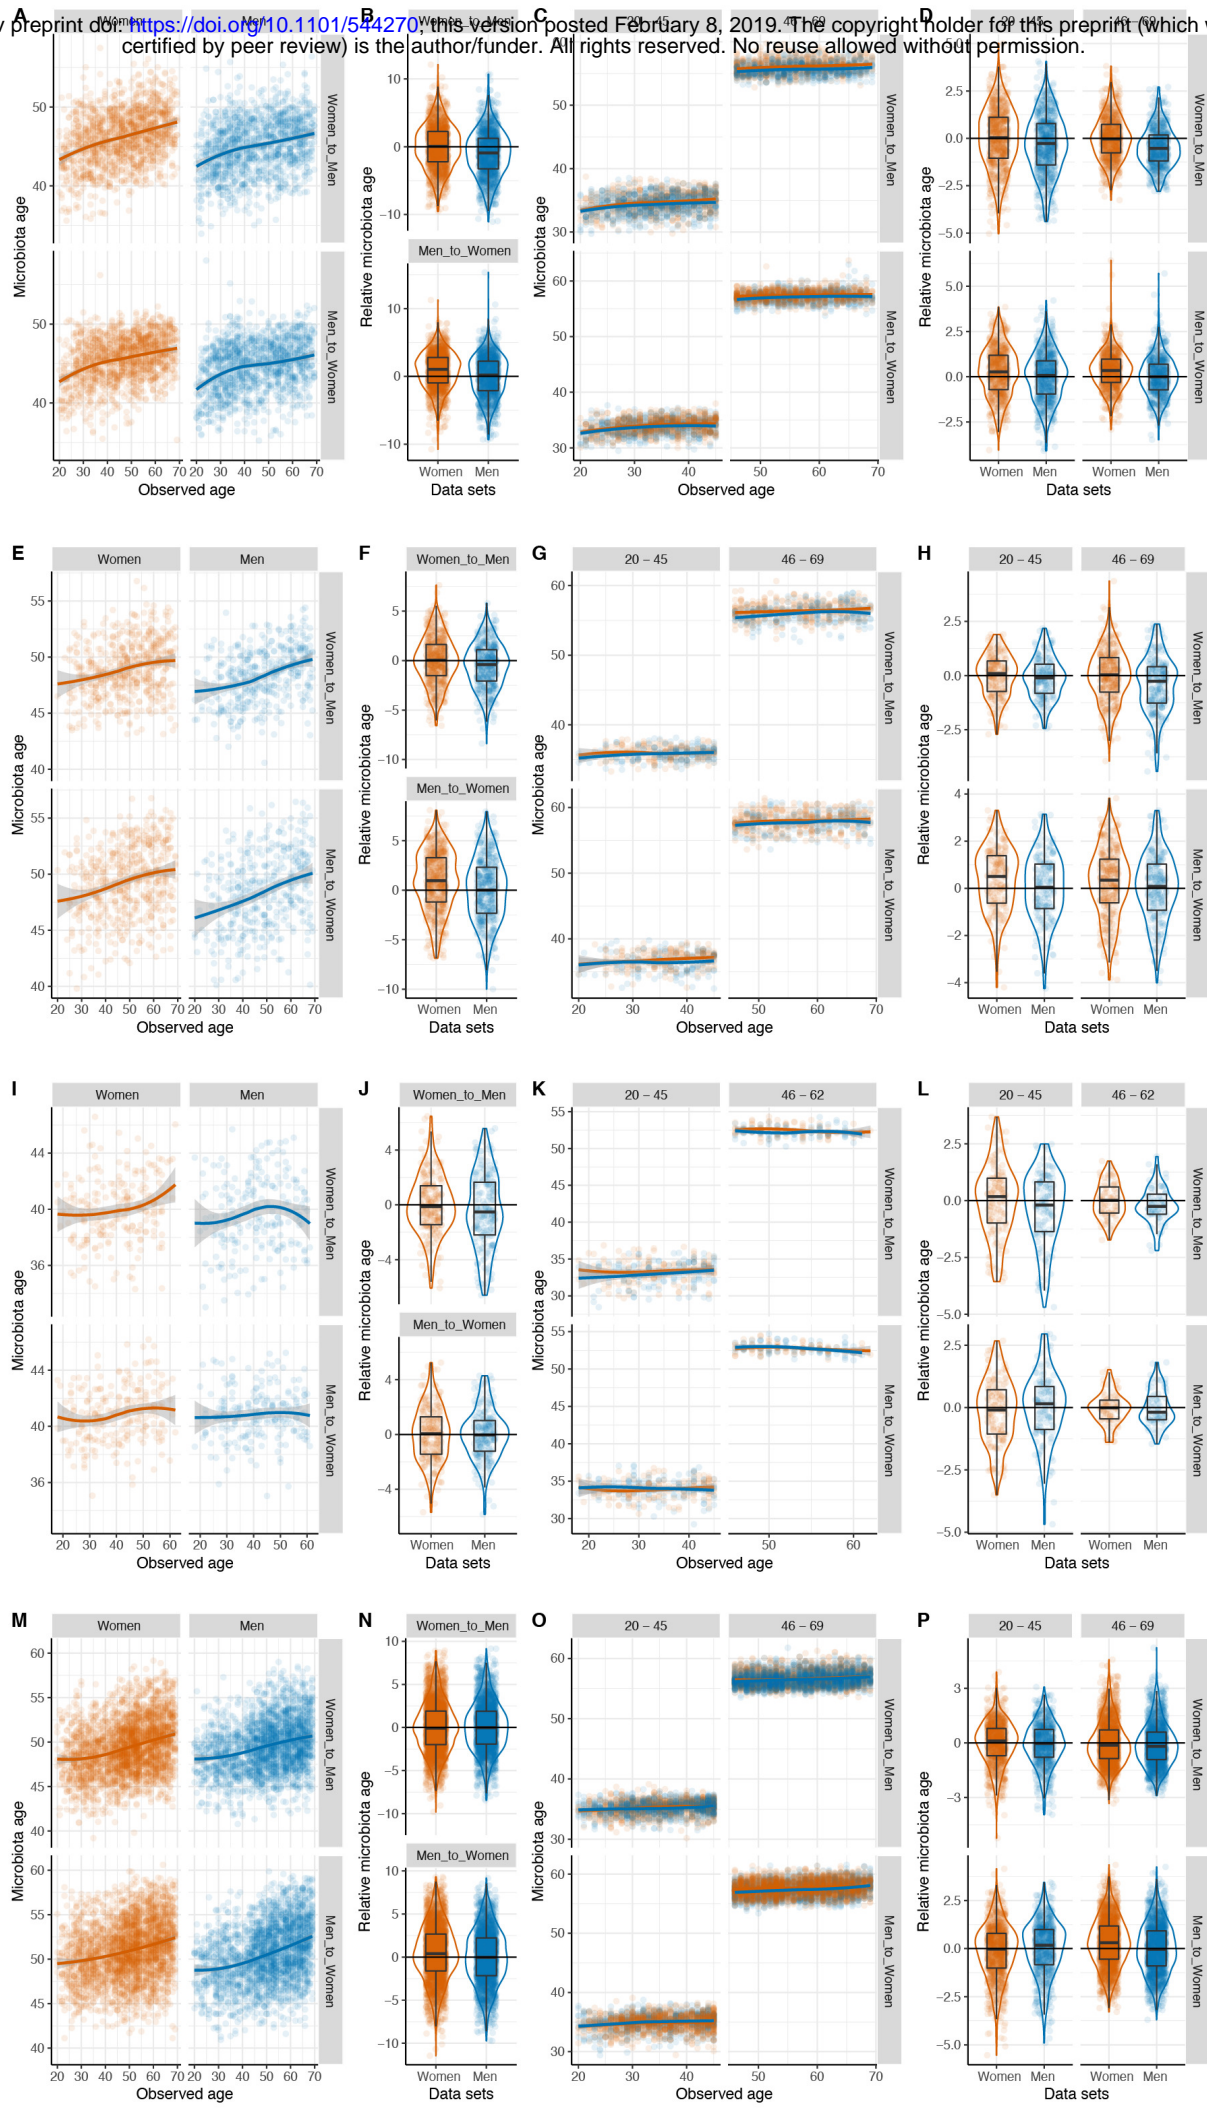

Source: https://www.biorxiv.org/content/10.1101/544270v1.full.pdf
